# Supplementary material for: Risk of Out-of-Hospital Sudden Cardiac Death in Users of Domperidone, Proton Pump Inhibitors, or Metoclopramide: A Population-Based Nested Case-Control Study
Source: PubMed Central journal article supplement — Drug Saf. 2015 Sep 8;38(12):1187–99. doi: 10.1007/s40264-015-0338-0 (PMC4659849; doi:10.1007/s40264-015-0338-0), 2015-09-08
Supplement: 40264_2015_338_MOESM1_ESM.pdf [file 40264_2015_338_MOESM1_ESM.pdf]

## *Drug Safety*

Risk of out-of-hospital sudden cardiac death in users of domperidone, users of proton pump inhibitors, and users of metoclopramide: a population-based nested case-control study

### Electronic supplementary material

Alejandro Arana, Epidemiology, RTI Health Solutions, Barcelona, Spain

Catherine B. Johannes, Epidemiology, RTI Health Solutions, Waltham, MA, USA

Lisa J. McQuay, Epidemiology, RTI Health Solutions, Research Triangle Park, NC, USA

Cristina Varas-Lorenzo, Epidemiology, RTI Health Solutions, Barcelona, Spain

Daniel Fife, Pharmaceutical Research and Development, Janssen Research & Development, Titusville, NJ, USA

Kenneth J. Rothman, Epidemiology, RTI Health Solutions, Waltham, MA, USA

### **List of Tables**

|           |                                                                                                                                                                                  |    |
|-----------|----------------------------------------------------------------------------------------------------------------------------------------------------------------------------------|----|
| Table S1. | Incidence per 1,000 person-years of sudden cardiac death in the exposure cohort, overall and stratified analyses, N = 681,104 .....                                              | 2  |
| Table S2. | Exposure status at the index date for nested case-control analysis .....                                                                                                         | 7  |
| Table S3. | Distribution of covariates among 3,239 cases and 12,572 controls and unadjusted odds ratio for sudden cardiac death, results of unadjusted conditional logistic regression ..... | 8  |
| Table S4. | Subgroup analyses by diabetes status and concurrent use of medications.....                                                                                                      | 13 |

**Table S1. Incidence per 1,000 person-years of sudden cardiac death in the exposure cohort, overall and stratified analyses, N = 681,104**

|                                      | Number of SCD cases | Number of person-years | Incidence rate per 1,000 person-years | 95% CI          |
|--------------------------------------|---------------------|------------------------|---------------------------------------|-----------------|
| <b>Total study cohort</b>            |                     |                        |                                       |                 |
| Total                                | 3,282               | 2,112,381.64           | 1.55                                  | (1.50 to 1.61)  |
| Male                                 | 1,917               | 904,678.90             | 2.12                                  | (2.03 to 2.22)  |
| Female                               | 1,365               | 1,207,702.74           | 1.13                                  | (1.07 to 1.19)  |
| <b>Age group (years)</b>             |                     |                        |                                       |                 |
| 2-15                                 | 0                   | 18,644.41              | 0.00                                  | (0.00 to 0.20)  |
| 16-25                                | 1                   | 95,866.23              | 0.01                                  | (0.00 to 0.06)  |
| 26-35                                | 7                   | 165,691.27             | 0.04                                  | (0.02 to 0.09)  |
| 36-45                                | 50                  | 301,892.44             | 0.17                                  | (0.12 to 0.22)  |
| 46-55                                | 164                 | 373,750.74             | 0.44                                  | (0.37 to 0.51)  |
| 56-65                                | 375                 | 426,150.32             | 0.88                                  | (0.79 to 0.97)  |
| 66-75                                | 668                 | 377,709.35             | 1.77                                  | (1.64 to 1.91)  |
| 76-85                                | 1,092               | 263,286.30             | 4.15                                  | (3.91 to 4.40)  |
| > 85                                 | 925                 | 89,390.59              | 10.35                                 | (9.69 to 11.04) |
| <b>Diabetes mellitus<sup>a</sup></b> |                     |                        |                                       |                 |
| None                                 | 2,633               | 1,957,911.16           | 1.34                                  | (1.29 to 1.40)  |
| Severity level 1                     | 516                 | 128,705.62             | 4.01                                  | (3.67 to 4.37)  |
| Severity level 2                     | 133                 | 25,719.11              | 5.17                                  | (4.33 to 6.13)  |

|                                            | Number of SCD cases | Number of person-years | Incidence rate per 1,000 person-years | 95% CI           |
|--------------------------------------------|---------------------|------------------------|---------------------------------------|------------------|
| <b>Domperidone current use<sup>b</sup></b> |                     |                        |                                       |                  |
| Total                                      | 90                  | 20,153.10              | 4.47                                  | (3.59 to 5.49)   |
| Male                                       | 34                  | 6,842.90               | 4.97                                  | (3.44 to 6.94)   |
| Female                                     | 56                  | 13,310.20              | 4.21                                  | (3.18 to 5.46)   |
| <b>Age group (years)</b>                   |                     |                        |                                       |                  |
| 2-15                                       | 0                   | 725.00                 | 0.00                                  | (0.00 to 5.09)   |
| 16-25                                      | 0                   | 868.47                 | 0.00                                  | (0.00 to 4.25)   |
| 26-35                                      | 1                   | 1,094.02               | 0.91                                  | (0.02 to 5.09)   |
| 36-45                                      | 0                   | 2,031.82               | 0.00                                  | (0.00 to 1.82)   |
| 46-55                                      | 3                   | 2,926.74               | 1.03                                  | (0.21 to 3.00)   |
| 56-65                                      | 12                  | 3,983.13               | 3.01                                  | (1.56 to 5.26)   |
| 66-75                                      | 12                  | 4,087.52               | 2.94                                  | (1.52 to 5.13)   |
| 76-85                                      | 26                  | 3,171.63               | 8.20                                  | (5.35 to 12.01)  |
| > 85                                       | 36                  | 1,264.77               | 28.46                                 | (19.94 to 39.41) |
| <b>Diabetes mellitus<sup>a</sup></b>       |                     |                        |                                       |                  |
| None                                       | 69                  | 18,007.26              | 3.83                                  | (2.98 to 4.85)   |
| Severity level 1                           | 14                  | 1,619.09               | 8.65                                  | (4.73 to 14.51)  |
| Severity level 2                           | 7                   | 526.70                 | 13.29                                 | (5.34 to 27.38)  |

|                                      | Number of SCD cases | Number of person-years | Incidence rate per 1,000 person-years | 95% CI           |
|--------------------------------------|---------------------|------------------------|---------------------------------------|------------------|
| <b>PPI current use<sup>b</sup></b>   |                     |                        |                                       |                  |
| Total                                | 2,064               | 778,229.45             | 2.65                                  | (2.54 to 2.77)   |
| Male                                 | 1,195               | 352,877.10             | 3.39                                  | (3.20 to 3.58)   |
| Female                               | 869                 | 425,352.34             | 2.04                                  | (1.91 to 2.18)   |
| <b>Age group (years)</b>             |                     |                        |                                       |                  |
| 2-15                                 | 0                   | 1,647.26               | 0.00                                  | (0.00 to 2.24)   |
| 16-25                                | 0                   | 7,758.51               | 0.00                                  | (0.00 to 0.48)   |
| 26-35                                | 3                   | 24,150.11              | 0.12                                  | (0.03 to 0.36)   |
| 36-45                                | 31                  | 68,915.69              | 0.45                                  | (0.31 to 0.64)   |
| 46-55                                | 97                  | 116,436.70             | 0.83                                  | (0.68 to 1.02)   |
| 56-65                                | 226                 | 179,067.85             | 1.26                                  | (1.10 to 1.44)   |
| 66-75                                | 409                 | 186,337.26             | 2.19                                  | (1.99 to 2.42)   |
| 76-85                                | 670                 | 141,926.41             | 4.72                                  | (4.37 to 5.09)   |
| > 85                                 | 628                 | 51,989.65              | 12.08                                 | (11.15 to 13.06) |
| <b>Diabetes mellitus<sup>a</sup></b> |                     |                        |                                       |                  |
| None                                 | 1,664               | 697,536.64             | 2.39                                  | (2.27 to 2.50)   |
| Severity level 1                     | 310                 | 67,835.84              | 4.57                                  | (4.08 to 5.11)   |
| Severity level 2                     | 90                  | 12,821.04              | 7.02                                  | (5.64 to 8.63)   |

|                                               | Number of SCD cases | Number of person-years | Incidence rate per 1,000 person-years | 95% CI           |
|-----------------------------------------------|---------------------|------------------------|---------------------------------------|------------------|
| <b>Metoclopramide current use<sup>b</sup></b> |                     |                        |                                       |                  |
| Total                                         | 83                  | 16,046.15              | 5.17                                  | (4.12 to 6.41)   |
| Male                                          | 34                  | 4,973.88               | 6.84                                  | (4.73 to 9.55)   |
| Female                                        | 49                  | 11,072.26              | 4.43                                  | (3.27 to 5.85)   |
| Age group (years)                             |                     |                        |                                       |                  |
| 2-15                                          | 0                   | 213.08                 | 0.00                                  | (0.00 to 17.31)  |
| 16-25                                         | 0                   | 772.75                 | 0.00                                  | (0.00 to 4.77)   |
| 26-35                                         | 0                   | 1,225.39               | 0.00                                  | (0.00 to 3.01)   |
| 36-45                                         | 3                   | 2,101.38               | 1.43                                  | (0.29 to 4.17)   |
| 46-55                                         | 4                   | 2,792.48               | 1.43                                  | (0.39 to 3.67)   |
| 56-65                                         | 10                  | 3,209.30               | 3.12                                  | (1.49 to 5.73)   |
| 66-75                                         | 16                  | 2,804.51               | 5.71                                  | (3.26 to 9.26)   |
| 76-85                                         | 24                  | 2,146.16               | 11.18                                 | (7.17 to 16.64)  |
| > 85                                          | 26                  | 781.09                 | 33.29                                 | (21.74 to 48.77) |
| Diabetes mellitus <sup>a</sup>                |                     |                        |                                       |                  |
| None                                          | 64                  | 14,423.75              | 4.44                                  | (3.42 to 5.67)   |
| Severity level 1                              | 14                  | 1,224.82               | 11.43                                 | (6.25 to 19.18)  |
| Severity level 2                              | 5                   | 397.57                 | 12.58                                 | (4.08 to 29.35)  |

|                                | Number of SCD cases | Number of person-years | Incidence rate per 1,000 person-years | 95% CI         |
|--------------------------------|---------------------|------------------------|---------------------------------------|----------------|
| <b>Non-use of study drug</b>   |                     |                        |                                       |                |
| Total                          | 1,151               | 1,318,758.17           | 0.87                                  | (0.82 to 0.92) |
| Male                           | 694                 | 547,276.73             | 1.27                                  | (1.18 to 1.37) |
| Female                         | 457                 | 771,481.44             | 0.59                                  | (0.54 to 0.65) |
| Age group (years)              |                     |                        |                                       |                |
| 2-15                           | 0                   | 16,347.76              | 0.00                                  | (0.00 to 0.23) |
| 16-25                          | 1                   | 86,926.20              | 0.01                                  | (0.00 to 0.06) |
| 26-35                          | 4                   | 140,007.65             | 0.03                                  | (0.01 to 0.07) |
| 36-45                          | 18                  | 230,876.84             | 0.08                                  | (0.05 to 0.12) |
| 46-55                          | 65                  | 254,925.52             | 0.25                                  | (0.20 to 0.32) |
| 56-65                          | 140                 | 244,442.72             | 0.57                                  | (0.48 to 0.68) |
| 66-75                          | 246                 | 189,008.25             | 1.30                                  | (1.14 to 1.47) |
| 76-85                          | 402                 | 119,518.34             | 3.36                                  | (3.04 to 3.71) |
| > 85                           | 275                 | 36,704.88              | 7.49                                  | (6.63 to 8.43) |
| Diabetes mellitus <sup>a</sup> |                     |                        |                                       |                |
| None                           | 918                 | 1,246,327.22           | 0.74                                  | (0.69 to 0.79) |
| Severity level 1               | 192                 | 59,869.21              | 3.21                                  | (2.77 to 3.69) |
| Severity level 2               | 41                  | 12,551.96              | 3.27                                  | (2.34 to 4.43) |

CI confidence interval, PPI proton pump inhibitor, SCD sudden cardiac death.

<sup>a</sup> Severity level 1: diagnosis only; severity level 2: diagnosis + insulin or complication.

<sup>b</sup> Current use of each study medication could include use of any other study medication.

**Table S2. Exposure status at the index date for nested case-control analysis**

| Case/control status | Exposure category                        | Number of subjects |
|---------------------|------------------------------------------|--------------------|
| Case                |                                          |                    |
|                     | Current exposure to domperidone alone    | 28                 |
|                     | Current exposure to PPI alone            | 1,935              |
|                     | Current exposure to metoclopramide alone | 37                 |
|                     | Current combined exposure                |                    |
|                     | Domperidone + PPI                        | 51                 |
|                     | Domperidone + metoclopramide             | 0                  |
|                     | PPI + metoclopramide                     | 41                 |
|                     | Domperidone + PPI + metoclopramide       | 4                  |
|                     | Past exposure to any study drug          | 341                |
|                     | No exposure to any study drug            | 802                |
| Control             |                                          |                    |
|                     | Current exposure to domperidone alone    | 52                 |
|                     | Current exposure to PPI alone            | 6,499              |
|                     | Current exposure to metoclopramide alone | 44                 |
|                     | Current combined exposure                |                    |
|                     | Domperidone + PPI                        | 90                 |
|                     | Domperidone + metoclopramide             | 0                  |
|                     | PPI + metoclopramide                     | 60                 |
|                     | Domperidone + PPI + metoclopramide       | 4                  |
|                     | Past exposure to any study drug          | 1,330              |
|                     | No exposure to any study drug            | 4,493              |

*PPI* proton pump inhibitor.

**Table S3. Distribution of covariates among 3,239 cases and 12,572 controls and unadjusted odds ratio for sudden cardiac death, results of unadjusted conditional logistic regression**

| Variable                                                  | SCD cases |      | Controls |      | Odds ratio matched for age, sex, and medical practice | 95% CI         |
|-----------------------------------------------------------|-----------|------|----------|------|-------------------------------------------------------|----------------|
|                                                           | N         | %    | N        | %    |                                                       |                |
| Diabetes mellitus                                         |           |      |          |      |                                                       |                |
| None                                                      | 2,521     | 77.8 | 10,761   | 85.6 |                                                       |                |
| Diagnosis only                                            | 558       | 17.2 | 1,546    | 12.3 | 1.60                                                  | (1.44 to 1.78) |
| Diagnosis + insulin or complication                       | 160       | 4.9  | 265      | 2.1  | 2.71                                                  | (2.21 to 3.33) |
| History of serious ventricular arrhythmia                 | 69        | 2.1  | 92       | 0.7  | 3.03                                                  | (2.21 to 4.16) |
| Autonomic neuropathy                                      | 19        | 0.6  | 33       | 0.3  | 2.33                                                  | (1.32 to 4.11) |
| Cerebrovascular disease                                   | 609       | 18.8 | 1,820    | 14.5 | 1.36                                                  | (1.23 to 1.51) |
| Myocardial infarction                                     | 896       | 27.7 | 1,309    | 10.4 | 3.46                                                  | (3.12 to 3.82) |
| Ischaemic heart disease other than myocardial infarction  | 977       | 30.2 | 2,284    | 18.2 | 2.01                                                  | (1.83 to 2.20) |
| Coronary revascularization procedure                      | 232       | 7.2  | 569      | 4.5  | 1.70                                                  | (1.44 to 2.00) |
| Heart failure                                             | 806       | 24.9 | 1,037    | 8.2  | 4.07                                                  | (3.64 to 4.54) |
| Pulmonary heart disease                                   | 106       | 3.3  | 260      | 2.1  | 1.61                                                  | (1.28 to 2.03) |
| Valvular heart disease, including valve replacement       | 208       | 6.4  | 465      | 3.7  | 1.83                                                  | (1.54 to 2.17) |
| Cardiomyopathy                                            | 37        | 1.1  | 54       | 0.4  | 2.78                                                  | (1.82 to 4.25) |
| Other arrhythmia or conduction disorder                   | 790       | 24.4 | 1,917    | 15.2 | 1.83                                                  | (1.66 to 2.02) |
| Electrophysiology procedures for treatment of arrhythmias | 166       | 5.1  | 333      | 2.6  | 1.93                                                  | (1.59 to 2.35) |
| Renal impairment                                          | 327       | 10.1 | 671      | 5.3  | 2.02                                                  | (1.75 to 2.33) |
| Hypertension                                              | 1,804     | 55.7 | 6,313    | 50.2 | 1.27                                                  | (1.17 to 1.38) |
| Hypercholesterolemia/ Hyperlipidemia                      | 695       | 21.5 | 2,272    | 18.1 | 1.30                                                  | (1.17 to 1.44) |
| Severe chronic obstructive pulmonary disease              | 75        | 2.3  | 236      | 1.9  | 1.26                                                  | (0.96 to 1.64) |



| Variable                                            | SCD cases |      | Controls |      | Odds ratio matched<br>for age, sex, and<br>medical practice | 95% CI         |
|-----------------------------------------------------|-----------|------|----------|------|-------------------------------------------------------------|----------------|
|                                                     | N         | %    | N        | %    |                                                             |                |
| Asthma                                              | 581       | 17.9 | 2,029    | 16.1 | 1.15                                                        | (1.04 to 1.27) |
| Epilepsy                                            | 95        | 2.9  | 250      | 2.0  | 1.52                                                        | (1.20 to 1.94) |
| Depression                                          | 791       | 24.4 | 2,605    | 20.7 | 1.27                                                        | (1.15 to 1.39) |
| Schizophrenia                                       | 37        | 1.1  | 46       | 0.4  | 3.20                                                        | (2.07 to 4.95) |
| Dyspepsia                                           | 736       | 22.7 | 3,465    | 27.6 | 0.76                                                        | (0.69 to 0.83) |
| Gastric or peptic ulcer                             | 338       | 10.4 | 1,163    | 9.3  | 1.15                                                        | (1.01 to 1.31) |
| Gastritis and duodenitis                            | 365       | 11.3 | 1,395    | 11.1 | 1.02                                                        | (0.90 to 1.16) |
| Gastro-oesophageal reflux disease                   | 379       | 11.7 | 1,802    | 14.3 | 0.78                                                        | (0.69 to 0.88) |
| Disorder of stomach/duodenum (other than dyspepsia) | 35        | 1.1  | 158      | 1.3  | 0.85                                                        | (0.58 to 1.23) |
| Liver failure                                       | 3         | 0.1  | 11       | 0.1  | 1.09                                                        | (0.30 to 3.91) |
| Hepatic impairment                                  | 67        | 2.1  | 171      | 1.4  | 1.58                                                        | (1.18 to 2.10) |
| Parkinson's disease                                 | 59        | 1.8  | 179      | 1.4  | 1.28                                                        | (0.95 to 1.73) |
| QTc-prolonging drugs, group 1 <sup>a</sup>          |           |      |          |      |                                                             |                |
| No exposure                                         | 2,404     | 74.2 | 10,238   | 81.4 |                                                             |                |
| Current exposure                                    | 402       | 12.4 | 855      | 6.8  | 2.02                                                        | (1.78 to 2.30) |
| Past exposure                                       | 433       | 13.4 | 1,479    | 11.8 | 1.26                                                        | (1.12 to 1.41) |
| QTc-prolonging drugs, group 2 <sup>a</sup>          |           |      |          |      |                                                             |                |
| No exposure                                         | 2,873     | 88.7 | 11,426   | 90.9 |                                                             |                |
| Current exposure                                    | 207       | 6.4  | 648      | 5.2  | 1.29                                                        | (1.09 to 1.52) |
| Past exposure                                       | 159       | 4.9  | 498      | 4.0  | 1.26                                                        | (1.05 to 1.52) |
| Strong CYP3A4 inhibitors                            |           |      |          |      |                                                             |                |
| No exposure                                         | 3,003     | 92.7 | 11,847   | 94.2 |                                                             |                |
| Current exposure                                    | 40        | 1.2  | 88       | 0.7  | 1.73                                                        | (1.18 to 2.53) |
| Past exposure                                       | 196       | 6.1  | 637      | 5.1  | 1.23                                                        | (1.04 to 1.46) |

| Variable                      | SCD cases |      | Controls |      | Odds ratio matched<br>for age, sex, and<br>medical practice | 95% CI         |
|-------------------------------|-----------|------|----------|------|-------------------------------------------------------------|----------------|
|                               | N         | %    | N        | %    |                                                             |                |
| Weak CYP3A4 inhibitors        |           |      |          |      |                                                             |                |
| No exposure                   | 2,633     | 81.3 | 11,063   | 88.0 |                                                             |                |
| Current exposure              | 287       | 8.9  | 600      | 4.8  | 2.06                                                        | (1.78 to 2.40) |
| Past exposure                 | 319       | 9.8  | 909      | 7.2  | 1.50                                                        | (1.31 to 1.72) |
| CYP3A4 inducers               |           |      |          |      |                                                             |                |
| No exposure                   | 2,424     | 74.8 | 10,208   | 81.2 |                                                             |                |
| Current exposure              | 417       | 12.9 | 1,025    | 8.2  | 1.74                                                        | (1.54 to 1.97) |
| Past exposure                 | 398       | 12.3 | 1,339    | 10.7 | 1.27                                                        | (1.12 to 1.43) |
| Drugs that affect <i>hERG</i> |           |      |          |      |                                                             |                |
| No exposure                   | 1,889     | 58.3 | 8,138    | 64.7 |                                                             |                |
| Current exposure              | 726       | 22.4 | 1,876    | 14.9 | 1.68                                                        | (1.52 to 1.86) |
| Past exposure                 | 624       | 19.3 | 2,558    | 20.3 | 1.06                                                        | (0.96 to 1.17) |
| Digoxin                       |           |      |          |      |                                                             |                |
| No exposure                   | 2,793     | 86.2 | 11,822   | 94.0 |                                                             |                |
| Current exposure              | 294       | 9.1  | 525      | 4.2  | 2.42                                                        | (2.08 to 2.83) |
| Past exposure                 | 152       | 4.7  | 225      | 1.8  | 2.98                                                        | (2.40 to 3.70) |
| Diuretics                     |           |      |          |      |                                                             |                |
| No exposure                   | 1,350     | 41.7 | 8,012    | 63.7 |                                                             |                |
| Current exposure              | 1,279     | 39.5 | 2,877    | 22.9 | 2.91                                                        | (2.65 to 3.21) |
| Past exposure                 | 610       | 18.8 | 1,683    | 13.4 | 2.31                                                        | (2.06 to 2.59) |
| Laxatives                     |           |      |          |      |                                                             |                |
| No exposure                   | 2,168     | 66.9 | 9,353    | 74.4 |                                                             |                |
| Current exposure              | 463       | 14.3 | 1,313    | 10.4 | 1.55                                                        | (1.37 to 1.75) |
| Past exposure                 | 608       | 18.8 | 1,906    | 15.2 | 1.39                                                        | (1.25 to 1.55) |

| Variable                                                    | SCD cases |      | Controls |      | Odds ratio matched<br>for age, sex, and<br>medical practice | 95% CI             |
|-------------------------------------------------------------|-----------|------|----------|------|-------------------------------------------------------------|--------------------|
|                                                             | N         | %    | N        | %    |                                                             |                    |
| Systemic beta-adrenergic receptor agonists                  |           |      |          |      |                                                             |                    |
| No exposure                                                 | 3,229     | 99.7 | 12,528   | 99.7 |                                                             |                    |
| Current exposure                                            |           |      | 2        | 0.0  | 0.00                                                        | (0.00 to 4.668757) |
| Past exposure                                               | 10        | 0.3  | 42       | 0.3  | 0.95                                                        | (0.48 to 1.90)     |
| Oral corticosteroids                                        |           |      |          |      |                                                             |                    |
| No exposure                                                 | 2,697     | 83.3 | 11,156   | 88.7 |                                                             |                    |
| Current exposure                                            | 256       | 7.9  | 516      | 4.1  | 2.08                                                        | (1.78 to 2.44)     |
| Past exposure                                               | 286       | 8.8  | 900      | 7.2  | 1.34                                                        | (1.17 to 1.55)     |
| Gastrointestinal medications other than study drugs         |           |      |          |      |                                                             |                    |
| Antihypertensive medications                                | 1,861     | 57.5 | 5,420    | 43.1 | 1.85                                                        | (1.71 to 2.01)     |
| Antiarrhythmic agents with action on repolarization time    | 235       | 7.3  | 698      | 5.6  | 1.34                                                        | (1.15 to 1.57)     |
| Antiarrhythmic agents without action on repolarization time | 247       | 7.6  | 635      | 5.1  | 1.57                                                        | (1.34 to 1.83)     |
| Beta-blockers                                               | 1,233     | 38.1 | 3,621    | 28.8 | 1.55                                                        | (1.42 to 1.68)     |
| Other cardiac medications                                   | 2,508     | 77.4 | 8,076    | 64.2 | 2.06                                                        | (1.87 to 2.27)     |
| Body mass index                                             |           |      |          |      |                                                             |                    |
| BMI < 20                                                    | 271       | 8.4  | 788      | 6.3  | 1.40                                                        | (1.20 to 1.64)     |
| 20 ≤ BMI < 25                                               | 880       | 27.2 | 3,559    | 28.3 |                                                             |                    |
| 25 ≤ BMI < 30                                               | 967       | 29.9 | 4,577    | 36.4 | 0.86                                                        | (0.78 to 0.95)     |
| 30 ≤ BMI < 40                                               | 614       | 19.0 | 2,396    | 19.1 | 1.06                                                        | (0.94 to 1.19)     |
| ≥ 40                                                        | 109       | 3.4  | 199      | 1.6  | 2.27                                                        | (1.77 to 2.91)     |
| Missing                                                     | 398       | 12.3 | 1,053    | 8.4  |                                                             |                    |

| Variable                      | SCD cases |      | Controls |      | Odds ratio matched<br>for age, sex, and<br>medical practice | 95% CI         |
|-------------------------------|-----------|------|----------|------|-------------------------------------------------------------|----------------|
|                               | N         | %    | N        | %    |                                                             |                |
| Smoking history               |           |      |          |      |                                                             |                |
| Current                       | 604       | 18.6 | 1,281    | 10.2 | 2.57                                                        | (2.27 to 2.90) |
| Former                        | 1,280     | 39.5 | 4,951    | 39.4 | 1.30                                                        | (1.19 to 1.43) |
| Never                         | 1,312     | 40.5 | 6,280    | 50.0 |                                                             |                |
| Missing                       | 43        | 1.3  | 60       | 0.5  |                                                             |                |
| Alcohol use                   |           |      |          |      |                                                             |                |
| Current                       | 1,938     | 59.8 | 8,452    | 67.2 | 0.81                                                        | (0.73 to 0.90) |
| Former                        | 178       | 5.5  | 560      | 4.5  | 1.14                                                        | (0.94 to 1.38) |
| Never                         | 697       | 21.5 | 2,486    | 19.8 |                                                             |                |
| Missing                       | 426       | 13.2 | 1,074    | 8.5  |                                                             |                |
| Number of GP visits           |           |      |          |      |                                                             |                |
| < 12                          | 891       | 27.5 | 4,955    | 39.4 |                                                             |                |
| 12-24                         | 1,140     | 35.2 | 4,967    | 39.5 | 1.37                                                        | (1.24 to 1.51) |
| > 24                          | 1,208     | 37.3 | 2,650    | 21.1 | 2.91                                                        | (2.62 to 3.25) |
| Number of hospital admissions |           |      |          |      |                                                             |                |
| 0                             | 1,772     | 54.7 | 8,412    | 66.9 |                                                             |                |
| 1                             | 745       | 23.0 | 2,453    | 19.5 | 1.45                                                        | (1.31 to 1.60) |
| 2                             | 388       | 12.0 | 997      | 7.9  | 1.88                                                        | (1.65 to 2.13) |
| ≥ 3                           | 334       | 10.3 | 710      | 5.6  | 2.27                                                        | (1.97 to 2.62) |

BMI body mass index, CI confidence interval, GP general practitioner, hERG human Ether-à-go-go-Related Gene, SCD sudden cardiac death.

<sup>a</sup> QTc-prolonging drugs that may cause arrhythmia or prolong the QTc interval were assessed from the most recent lists available from the CredibleMeds website (maintained by AZCERT, Inc.) on September 11, 2013. Group 1 included drugs with a risk of torsades de pointes (TdP) and Group 2 were drugs with a possible risk of TdP.

**Table S4. Subgroup analyses by diabetes status and concurrent use of medications**

| Exposure category<br>(categories are mutually exclusive) | Diabetes status                |                                  | CYP3A4 inhibitors                |                                   | QTc-prolonging medications (group 1) |                                   |
|----------------------------------------------------------|--------------------------------|----------------------------------|----------------------------------|-----------------------------------|--------------------------------------|-----------------------------------|
|                                                          | None<br>odds ratio<br>(95% CI) | Yes<br>odds ratio (95%<br>CI)    | No use<br>odds ratio<br>(95% CI) | Any use<br>odds ratio (95%<br>CI) | No use<br>odds ratio (95%<br>CI)     | Any use<br>odds ratio<br>(95% CI) |
| Current exposure to domperidone                          | 2.53<br>(1.20 to 5.31)         | 0.72<br>(0.04 to 12.00)          | 1.54<br>(0.70 to 3.38)           | 3.61<br>(0.44 to 29.66)           | 1.64<br>(0.73 to 3.72)               | 4.95<br>(0.84 to 29.07)           |
| Current exposure to PPI                                  | 1.45<br>(1.26 to 1.66)         | 1.18<br>(0.76 to 1.84)           | 1.41<br>(1.24 to 1.62)           | 1.41<br>(0.84 to 2.36)            | 1.38<br>(1.21 to 1.58)               | 1.25<br>(0.79 to 1.97)            |
| Current exposure to metoclopramide                       | 3.76<br>(1.72 to 8.22)         | 5584131.19<br>(0.00 to Infinity) | 4.85<br>(2.33 to 10.11)          | 12668469.1 (0.00<br>to Infinity)  | 4.83<br>(2.31 to 10.11)              | 6.63<br>(0.53 to 82.90)           |
| Current combined exposure                                | 3.29<br>(2.10 to 5.15)         | 3.03<br>(0.69 to 13.22)          | 2.73<br>(1.71 to 4.37)           | 13.01<br>(2.90 to 58.40)          | 2.04<br>(1.28 to 3.27)               | 5.08<br>(1.24 to 20.80)           |
| Past exposure to any study drug                          | 1.29<br>(1.04 to 1.59)         | 0.74<br>(0.39 to 1.43)           | 1.16<br>(0.94 to 1.44)           | 1.89<br>(0.90 to 3.95)            | 1.18<br>(0.95 to 1.45)               | 1.74<br>(0.87 to 3.46)            |
| No exposure to any study drug                            | Reference                      | Reference                        | Reference                        | Reference                         | Reference                            | Reference                         |

CI confidence interval, PPI proton pump inhibitor.
